# Supplementary material for: Ecobat: An online resource to facilitate transparent, evidence‐based interpretation of bat activity data
Source: PubMed Central journal article supplement (PMC5773315; doi:10.1002/ece3.3692), 2017-12-12
Supplement: ECE3-8-935-s001.pdf [file ECE3-8-935-s001.pdf]

1 Appendix 1

2

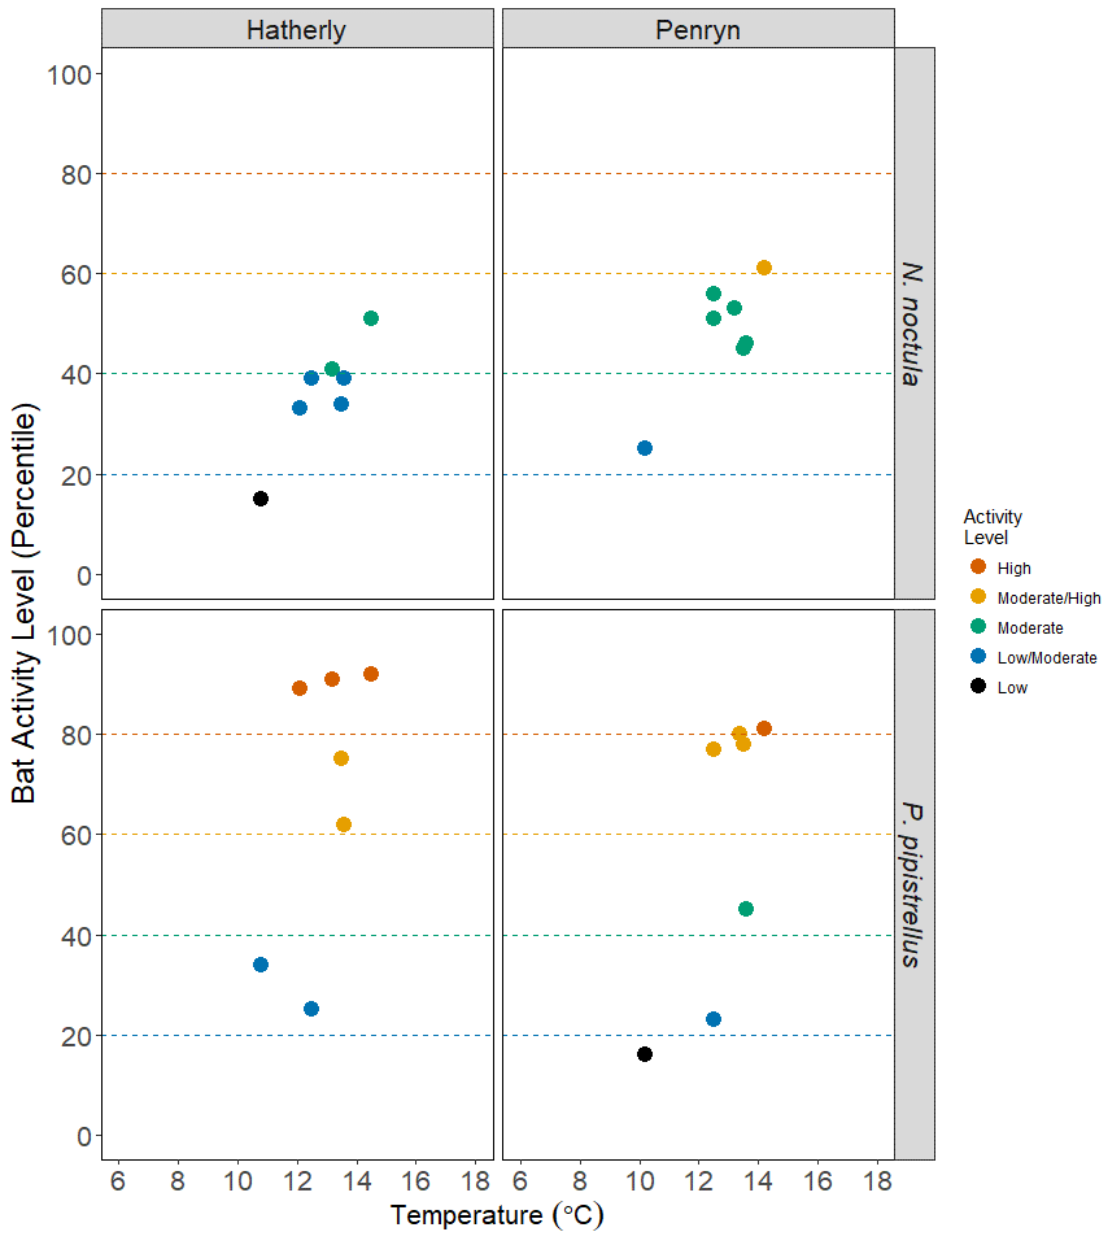

3

4 **Appendix 1a.** The relationship between nightly bat activity and sunset temperature, split by location

5 and species. Dashed lines indicate thresholds of bat activity categories (i.e. low activity 0-20<sup>th</sup>

6 percentiles, low to moderate activity: 21<sup>st</sup>-40<sup>th</sup> percentiles).

7

8

9

10

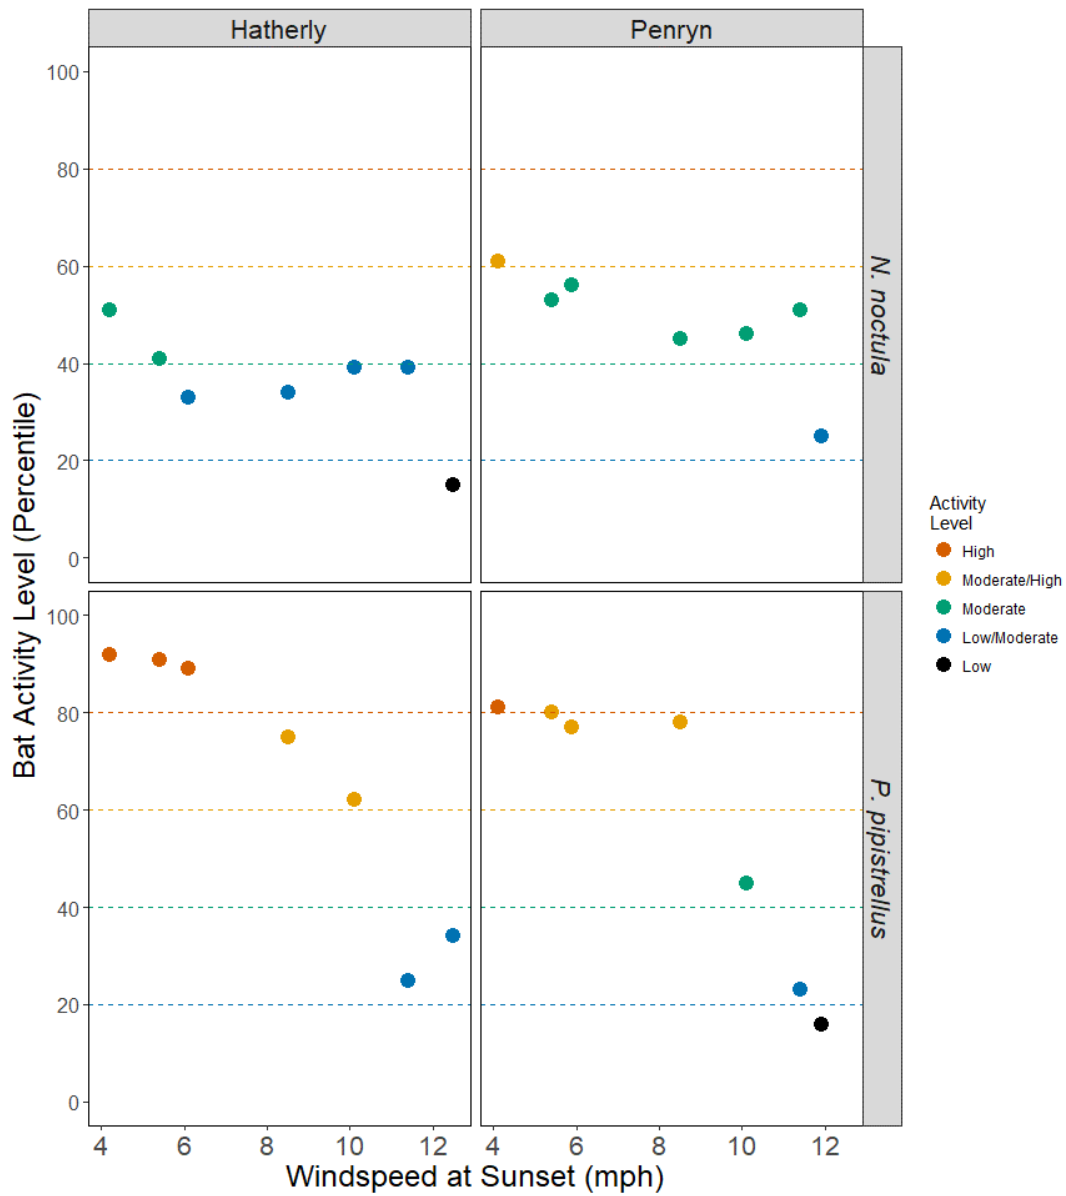

11  
12

13 **Appendix 1b.** The relationship between nightly bat activity and the windspeed at sunset, split by  
 14 location and species. Dashed lines indicate thresholds of bat activity categories (i.e. low activity 0-  
 15 20<sup>th</sup> percentiles, low to moderate activity: 21<sup>st</sup>-40<sup>th</sup> percentiles).

16
